# Supplementary material for: Aerosol trace metal leaching and impacts on marine microorganisms
Source: PubMed Central journal article supplement (PMC6033952; doi:10.1038/s41467-018-04970-7), 2018-07-05
Supplement: 41467_2018_4970_MOESM1_ESM.pdf [file 41467_2018_4970_MOESM1_ESM.pdf]

1 **Supplementary materials**  
2

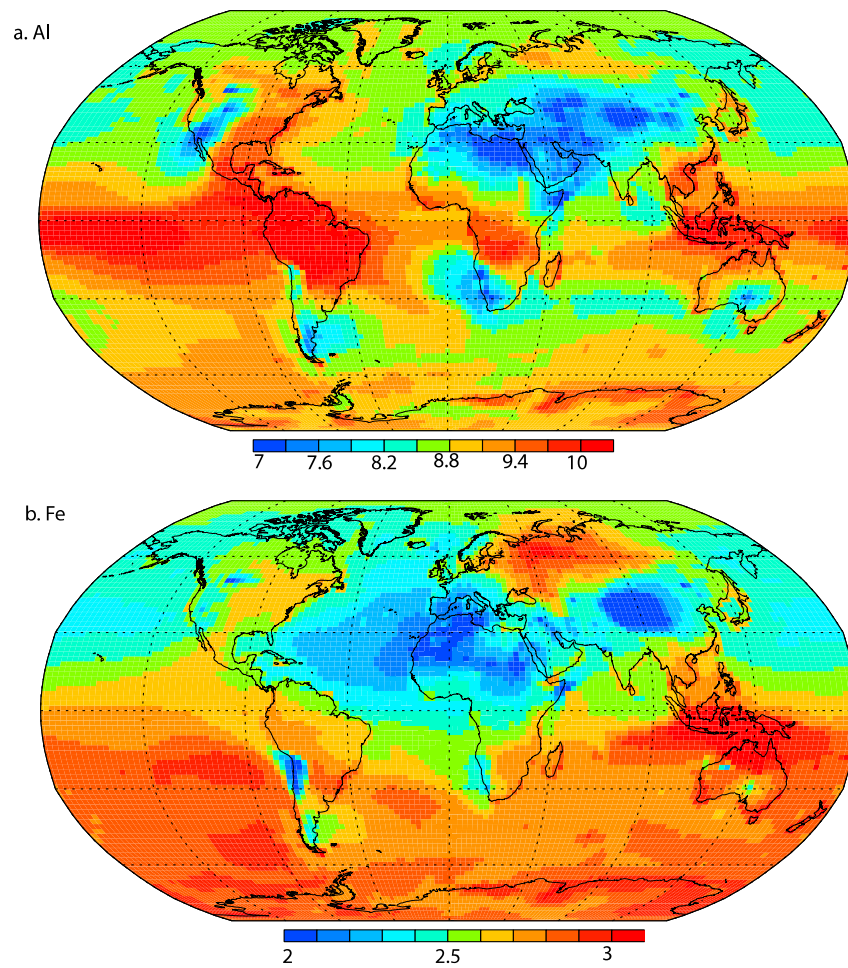

3  
4  
5 Supplementary Figure 1: Spatial distribution of the annual average ratio of mass fraction of elements  
6 in dust deposition in percentage units for Al (a) and Fe (b) from model estimates <sup>4</sup>.  
7  
8

9

**Supplementary Table 1: coefficients for simple plume models presented in Box 2.**

| Coefficient                                    | Value    |
|------------------------------------------------|----------|
| Dust lifetime ( $t_d$ )                        | 2 days   |
| Advection speed ( $u$ )                        | 5 m/s    |
| Dust spatial scale ( $D_d$ )                   | 864km    |
| Fine soluble Fe lifetime ( $t_f$ )             | 5 days   |
| Fine soluble Fe spatial scale ( $D_f$ )        | 2160km   |
| Atmospheric processing lifetime ( $t_c$ )      | 60 days  |
| Atmospheric processing spatial scale ( $D_c$ ) | 25920 km |
| Pollutant lifetime ( $t_p$ )                   | 5 days   |
| Pollutant spatial scale ( $D_p$ )              | 2160km   |

10

11

12

13

**Supplementary Table 2: Compilation of incubation bottle responses to additions**

| Study                             | Specific Location, Lat Long                                                                                                                                                                     | Metals | Biological response                                                                                                                                                                                   | Cruises                                                                                              |
|-----------------------------------|-------------------------------------------------------------------------------------------------------------------------------------------------------------------------------------------------|--------|-------------------------------------------------------------------------------------------------------------------------------------------------------------------------------------------------------|------------------------------------------------------------------------------------------------------|
| Mahaffey et al. 2014 <sup>3</sup> | North Atlantic transect<br><br>-Experiments on D326:<br>B2- 17.7°N, 24.3°W<br>B3- 12.3°N, 35.8°W<br>B4- 16.1°N, 30.6°W<br>-Experiments on D361<br>Zn1- 0.83°N, 25.23°W<br>Zn2- 15.81°N, 28.73°W | Zn     | The addition of Sahara dust stimulated alkaline phosphatase activity. Alkaline phosphatase activity was found to be greater in the subtropical Atlantic Ocean than the the subtropical Pacific Ocean. | Cruises on the RRS Discovery<br>1. D326: (01/05/2008-02/05/2008)<br>2. D361: (02/07/2011-03/19/2011) |
| Browning et al. 2017 <sup>4</sup> | North Atlantic transect                                                                                                                                                                         | Fe     | Fe limits APA in the low dust western Atlantic, but not in the high dust Eastern Atlantic.                                                                                                            | Meteor 60<br>Transient Tracers<br>Revisited<br>expedition                                            |
| Chien et al. 2016 <sup>5</sup>    | Caribbean Sea near Barbados<br><br>-Seawater collection (Feb 2012)<br>13°11.309'N, 59°38.267'W                                                                                                  | Fe     | High Fe (and N) in Sahara dust relative to P causes P limitation, which favors Prochlorococcus because it has low P cell quotas.                                                                      | GEOTRACES<br>cruise GA02                                                                             |

|                                 |                                                                                                                                                                                                                                                                                                                                                                                                                                                                                   |            |                                                                                                                                                                                                                                                                                                                                              |                           |
|---------------------------------|-----------------------------------------------------------------------------------------------------------------------------------------------------------------------------------------------------------------------------------------------------------------------------------------------------------------------------------------------------------------------------------------------------------------------------------------------------------------------------------|------------|----------------------------------------------------------------------------------------------------------------------------------------------------------------------------------------------------------------------------------------------------------------------------------------------------------------------------------------------|---------------------------|
| Mills et al. 2004 <sup>6</sup>  | <p>North Atlantic transect</p> <p>-Incubation locations in tropical Atlantic (October–November 2002)</p> <p>Location 1: 10°N, 35°W</p> <p>Location 2: 4°N 24°W</p> <p>Location 3: 11°N 18°W</p>                                                                                                                                                                                                                                                                                   | Fe         | Nitrogen fixation is co-limited by N and P, and Saharan dust additions stimulated nitrogen fixation in the eastern North Atlantic by providing Fe and P.                                                                                                                                                                                     | Meteor 55 research cruise |
| Mackey et al. 2012 <sup>7</sup> | <p>Sargasso Sea</p> <p>-Bermuda Atlantic Time-series Station: 31°40'N, 64°10'W</p> <p>-Coastal experiment at Buoy 3A: 32°24.531'N, 64°44.769'W</p>                                                                                                                                                                                                                                                                                                                                | Co, Mn, Ni | Aerosol-derived Co, Mn, and Ni supported growth of oceanic (but not coastal) <i>Synechococcus</i> . Aerosol copper additions did not cause [Cu'] to exceed toxicity levels, and the production of Cu-binding ligands may indicate a nutritive role for Cu.                                                                                   | NA                        |
| Duarte et al. 2006 <sup>8</sup> | <p>Northeast Atlantic</p> <p>(May-June 2003)- West African Coast: -26.0°W and parallels 26.0° and 21.0°N</p> <p>-Pulse experiment for surface seawater 25.99°N, 18.0°W</p> <p>-A dose experiment 21.0°N, 23.0°W</p> <p>-North transect (coastal ocean): 26.0°N</p> <p>-South transect (coastal ocean): 21.1°N</p> <p>-48-hour back trajectory for an open ocean site (21 N, 26 W) (May 29 2003)</p> <p>-48-hour back trajectory for a coastal site (27 N, 15 W) (May 21 2003)</p> | Fe         | Aerosol addition led to a sevenfold increase in phytoplankton biomass and a tenfold increase in production over 4 days. Primary production was stimulated more than community respiration. The phytoplankton community shifted from picocyanobacteria-dominated to diatom-dominated. Bacterial abundance and production was less responsive. | Boat: R/V Hespérides      |

|                                  |                                                                                                                                                                                                                                                                                                                                                                        |             |                                                                                                                                                                                                                                                                        |                                                                                  |
|----------------------------------|------------------------------------------------------------------------------------------------------------------------------------------------------------------------------------------------------------------------------------------------------------------------------------------------------------------------------------------------------------------------|-------------|------------------------------------------------------------------------------------------------------------------------------------------------------------------------------------------------------------------------------------------------------------------------|----------------------------------------------------------------------------------|
| Chien et al. 2016 <sup>5</sup>   | <p>North Atlantic</p> <p>Incubations:<br/> -E1: Lat: 10.8/Lon: 52.3<br/> -E2: Lat: 8.3/Lon: 51.7<br/> -E3: Lat: 11.6 Lon: 55.7</p>                                                                                                                                                                                                                                     | Fe          | <p>The diazotroph <i>Trichodesmium</i> shows luxury uptake of aerosol Fe. Uptake of Fe was proportional to the cellular P:Fe ratio and the amount of Fe leached from the aerosols.</p>                                                                                 | NA                                                                               |
| Maranon et al. 2010 <sup>9</sup> | <p>Atlantic Ocean transect</p> <p>Experiment locations<br/> 1) 26.0°N, 34.8°W<br/> 2) 13.8°N, 28.4°W<br/> 3) 17.8°S, 29.0°W<br/> 4) 33.8°S, 38.4°W<br/> 5) 16.1°S, 29.0°W<br/> 6) 0.6°S, 29.0°W<br/> 7) 14.4°N, 29.0°W<br/> 8) 29.2°N, 28.3°W</p>                                                                                                                      | unspecified | <p>Dust additions increased bacterial production in ultraoligotrophic environments, and the effect was larger with increased oligotrophy. Primary production only increased in the least oligotrophic waters, and the effect was smaller as oligotrophy increased.</p> | Tropical Atlantic (TRYNITROP) cruises                                            |
| Moore et al. 2006 <sup>10</sup>  | <p>North Atlantic</p> <p>-48 hour incubation (nutrient enrichment bioassay experiments)<br/> Location 1: 42.0°N, 42.0°W<br/> Location 2: 35.0°N, 56.0°W<br/> Location 3: 31.0°N, 27.0°W<br/> -Bioassay experiments<br/> 1) 21°N 62°W<br/> 2) 28°N 64°W<br/> 3) 29°N 52°W<br/> 4) 31°N 27°W<br/> 5) 32°N 44°W<br/> 6) 36°N 24°W<br/> 7) 35°N 56°W<br/> 8) 42°N 42°W</p> | Fe          | <p>The episodic nature of Fe provided by dust deposition affects the dynamics of the spring bloom because Fe availability controls N consumption.</p>                                                                                                                  | <p>Meteor 60 Transient Tracers Revisited expedition (March &amp; April 2004)</p> |

|                                                                    |                                                                                                                                                                                                                                                                                                                                                                                                         |             |                                                                                                                                                                                                                                                                                                                                                                                                                                                                                                    |                           |
|--------------------------------------------------------------------|---------------------------------------------------------------------------------------------------------------------------------------------------------------------------------------------------------------------------------------------------------------------------------------------------------------------------------------------------------------------------------------------------------|-------------|----------------------------------------------------------------------------------------------------------------------------------------------------------------------------------------------------------------------------------------------------------------------------------------------------------------------------------------------------------------------------------------------------------------------------------------------------------------------------------------------------|---------------------------|
| Langlois et al. 2012 <sup>11</sup>                                 | Tropical North Atlantic Ocean<br><br>Experiment site A: 4° N, 24° W<br>Experiment site B: 11° N, 18° W<br>Experiment site C: 6° N, 16° W                                                                                                                                                                                                                                                                | Fe          | Sahara dust additions stimulated N <sub>2</sub> fixation, and diazotroph (unicellular cyanobacteria groups A, B and C, as well as Gamma A proteobacteria) abundances. Dust additions had an increasingly negative effect on Synechococcus and Prochlorococcus abundances, but an increasingly positive effect on picoeukaryotes moving eastward. Laboratory culture experiments showed that Fe from Sahara dust promoted colony formation in Trichodesmium erythrium.                              | Meteor 55 research cruise |
| Guieu et al. 2014 <sup>12</sup> , Wuttig et al. 2013 <sup>13</sup> | Mediterranean Sea<br><br>-Guieu paper:<br>Transect: Lat: 40.0°-45.0°N Lon: 5.0°-10.0°E<br><br>Wuttig paper:<br>-7 mesocosms distributed in the Bay of Elbo at 42.374° N, 8.554° E                                                                                                                                                                                                                       | Mn, Al, Fe  | Changes in dissolved Fe following 2 sequential dust additions depended on biological ligand production; low ligand concentrations during the initial addition allowed Fe to scavenge onto particles, while higher biogenic ligand concentrations during the second addition allowed higher levels of dissolved Fe to persist. Al and Mn showed similar dissolution behaviors between the first and second additions, suggesting they were not affected by uptake or absorption into phytoplankton. | NA                        |
| Herut et al. 2005 <sup>14</sup>                                    | Mediterranean Sea<br><br>-SSW collected at (station 2CYC23) at 33°24.85 N; 32°18.49°E<br>-location of atmospheric aerosol samples:<br>1) Lat: 32°16.89<br>Long: 33°09.44<br>2) Lat: 32°59.81<br>Long: 33°14.87<br>3) Lat: 32°49.86<br>Lon: 33°15.86<br>4) Lat: 32°45.64<br>Lon: 33°23.73<br>5) Lat: 32°57.93<br>Lon: 33°24.13<br>6) Lat: 33°07.35<br>Lon: 33°18.83<br>7) Lat: 34°00.05<br>Lon: 32°39.98 | unspecified | Saharan dust increased phytopigments and primary production. Synechococcus, prymnesiophytes, and ciliates increased in abundance, Prochlorococcus declined, and heterotrophic bacterial production increased                                                                                                                                                                                                                                                                                       | Boat: R.V. Aegaeo         |

|                                      |                                                                                                                                                                                                |               |                                                                                                                                                                                                                                                                                                                                |                      |
|--------------------------------------|------------------------------------------------------------------------------------------------------------------------------------------------------------------------------------------------|---------------|--------------------------------------------------------------------------------------------------------------------------------------------------------------------------------------------------------------------------------------------------------------------------------------------------------------------------------|----------------------|
| Lekunberri et al. 2010 <sup>15</sup> | Mediterranean Sea<br><br>-Experiments occurred in The Blanes Bay Microbial Observatory, 41°40'0"N, 2°48'0"E<br>-Saharan dust collected in Villefranche-sur-Mer, France (43°42'18"N, 7°18'45"E) | unspecified   | Low dust (0.05g/L) addition favored heterotrophy, while high dust (0.5g/L) or P additions favored autotrophy.                                                                                                                                                                                                                  | NA                   |
| Bonnet et al. 2005 <sup>16</sup>     | Mediterranean Sea<br><br>DYFAMED site (43°25'N, 78°29'E)                                                                                                                                       | Fe            | Fe and P from aerosols stimulated primary production, and dust additions favored eukaryotic phytoplankton.                                                                                                                                                                                                                     | Boat: R/V Te'thys II |
| Romero et al. 2011 <sup>17</sup>     | Mediterranean Sea<br>Blanes Bay<br><br>-Aerosol collection in Nice, France: 43°42'10" N, 7°16'9" E<br>-Water collection at Blanes Bay Microbial Observator: (41°40' 0"N, 2°48'0"E)             | unspecified   | Low dust (0.05g/L) or P addition favored phototrophic nanoflagellates, while high dust (0.5g/L) additions increased bacterial abundance.                                                                                                                                                                                       | NA                   |
| Ridame et al. 2011 <sup>18</sup>     | Mediterranean Sea<br><br>Incubations<br>Station A (Western Basin) : 39°11'0 N, 5°35'0 E<br>Station B (Ionian Sea) : 34°13'0 N, 18°45'0 E<br>Station C (Levantine Sea): 33°63' N, 32°65' E      | Fe and others | Saharan dust input relieved nutrient limitation of N <sub>2</sub> fixation and the response was geographically variable. N <sub>2</sub> fixation was P limited at many sites. A strong response to dust at one site that was not P limited suggested that one or more other nutrients increased N <sub>2</sub> fixation rates. | European BOUM cruise |
| Ridame et al. 2013 <sup>19</sup>     | Northwestern Mediterranean Sea<br><br>-Experiments conducted at Natural Preservation Area of Scandola (8.554° E, 42.374° N)                                                                    | Fe            | Wet and dry Sahara dust deposition induced a rapid increase in N <sub>2</sub> fixation. N <sub>2</sub> fixation was not inhibited by N in the dust.                                                                                                                                                                            | The DUNE project     |

|                                  |                                                                                                                                                                                                                                                                                                                                             |                                        |                                                                                                                                                                                                                                                                                                                                                                                      |                                                                                                                                              |
|----------------------------------|---------------------------------------------------------------------------------------------------------------------------------------------------------------------------------------------------------------------------------------------------------------------------------------------------------------------------------------------|----------------------------------------|--------------------------------------------------------------------------------------------------------------------------------------------------------------------------------------------------------------------------------------------------------------------------------------------------------------------------------------------------------------------------------------|----------------------------------------------------------------------------------------------------------------------------------------------|
| Mackey et al. 2017 <sup>20</sup> | <p>East China Sea</p> <p>-Site 1 for seawater collection/incubation: (30°43'04"N, 122°39'58"E)</p> <p>-Site 2 for seawater collection/incubation: (30°38'12.2"N, 122°56'8.51" E)</p> <p>-Aerosol collection: (30.86°N, 122.67°E)</p> <p>-Map showing HABs in Eastern China: Lat: 28°-32°N Lon: 120°-128E</p>                                | Al, Cd, Co, Cu, Fe, Mn, Ni, Pb, and Zn | <p>High Fe (and N) in Asia aerosols induces P limitation and favors dinoflagellates that benefit from the high Fe and low N:P ratios. <i>Synechococcus</i> was weakly correlated with high Cu, low Fe, and low N:P ratios. Increased anthropogenic aerosol emissions over the past three decades may contribute to the observed increase in harmful algal blooms in this region.</p> | NA                                                                                                                                           |
| Guo et al. 2012 <sup>33</sup>    | <p>South China Sea</p> <p>-Range of experiments: Lat: 16°-24° N; Lon: 110°-120° E</p> <p>-Bioassay experiments (type of location/depth):</p> <ol style="list-style-type: none"> <li>1)coastal/17 m</li> <li>2)continental shelf/137 m</li> <li>3)oceanic/ 3844 m</li> <li>4)continental slope/ 854 m</li> <li>5) oceanic/ 3340 m</li> </ol> | Fe and mixed metals                    | <p>High aerosol loading increased total phytoplankton biomass and photosynthetic efficiency, and favored microphytoplankton like diatoms over picoplankton. Possible Cu toxicity was observed for <i>Synechococcus</i>.</p>                                                                                                                                                          | Aerosol samples were collected locally on the rooftop of the Academic Building at the Hong Kong University of Science and Technology (HKUST) |
| Bonnet et al. 2008 <sup>21</sup> | <p>Southeast Pacific</p> <p>-Experiment stations</p> <p>Station 1 (HNL): 9°04'S, 136°97'W</p> <p>Station 2 (GYR): 26°04'S, 114°02'W</p> <p>Station 3 (EGY): 31°89'S, 91°39'W</p>                                                                                                                                                            | Fe                                     | <p>Dust additions did not stimulate N<sub>2</sub> fixation despite the ultra low dissolved Fe concentrations at the sites. Productivity was only Fe limited at the edge of the gyre.</p>                                                                                                                                                                                             | BIOSOPE cruise                                                                                                                               |
| Maki et al. 2011 <sup>22</sup>   | <p>seashore of Kii Peninsula, at a distance of 150 km</p> <p>33°29'N, 136°59'E</p>                                                                                                                                                                                                                                                          | unspecified                            | <p>Asian dust particles from the Mt. Tateyama snow layers and the surface sand of Loess Plateau stimulated Gram-positive and alpha proteobacterial growth. No enrichment of chlorophyll resulted from dust additions.</p>                                                                                                                                                            | SE0926 cruise of T/S Seisui Maru (Mie University)                                                                                            |
| Liu et al. 2013 <sup>23</sup>    | <p>Yellow Sea</p> <p>-Incubation site A2: 36°04.116'N, 123°11.082'E</p>                                                                                                                                                                                                                                                                     | Fe                                     | <p>Asian dust stimulated chlorophyll at the highest dose (20mg/L) only. Rainwater stimulated chlorophyll and the abundance of microphytoplankton, had no effect on</p>                                                                                                                                                                                                               | Cruise on the R/V Dongfanghong 2 (18 March to 4 April 2011)                                                                                  |

|                                    |                                                                                                                                                                         |             |                                                                                                                                                                                                                                                                                                                                          |                                                         |
|------------------------------------|-------------------------------------------------------------------------------------------------------------------------------------------------------------------------|-------------|------------------------------------------------------------------------------------------------------------------------------------------------------------------------------------------------------------------------------------------------------------------------------------------------------------------------------------------|---------------------------------------------------------|
|                                    |                                                                                                                                                                         |             | picoplankton, and inhibited nanoplankton.                                                                                                                                                                                                                                                                                                |                                                         |
| Mélançon et al. 2016 <sup>24</sup> | Northeast subarctic Pacific HNLC<br>-Water collection: 50° N, 145° W (10m depth)                                                                                        | Fe          | Aerosol Fe stimulated chlorophyll and particulate organic carbon production, but the response was reduced under low pH conditions. Dust additions had a fertilizing effect mainly on diatoms and cyanobacteria.                                                                                                                          | Cruise on the Canadian Coast Guard Ship John P. Tully   |
| Hamme et al. 2010 <sup>25</sup>    | subarctic northeast Pacific<br><br>-Region tested for chlorophyll 48–56°N, 136–150°W<br>-Location of Kasatochi volcano (52.2°N, 175.5°W)<br>-Station P (sampling) 145°W | Fe          | Fe in volcanic ash from the Aleutian Islands induced a large diatom bloom several days following deposition.                                                                                                                                                                                                                             | Two cruises (no names included) August 2008             |
| Foster et al. 2009 <sup>42</sup>   | Gulf of Aqaba<br><br>-Seawater collection<br>Station A: 29°27.815'N, 34°55.830'E<br>Station B: 29°22.608'N, 34°53.894'E                                                 | unspecified | Highest N <sub>2</sub> fixation rates were observed in the dust addition treatment.                                                                                                                                                                                                                                                      | NA                                                      |
| Wang et al. 2017 <sup>26</sup>     | East China Sea<br><br>-Sampling station: 30.86°N, 122.67°E<br>-Sampling station: 30.85°N, 123.42°E                                                                      | Fe, Cu      | The ratio of Fe/Cu in aerosols influenced the toxicity of Cu on phytoplankton. Higher Fe/Cu ratios mitigated the toxic effect and were correlated with higher chlorophyll levels in offshore waters. Fe/Ce ratios did not affect chlorophyll concentrations in coastal regions where rivers and upwelling dominated the biogeochemistry. | No cruise name but sampling station was Huaniao Island. |
| Paytan et al. 2009 <sup>27</sup>   | Gulf of Aqaba                                                                                                                                                           | Cu          | Aerosol Cu caused toxicity for <i>Synechococcus</i> and picoeukaryotes, but not for <i>Prochlorococcus</i>                                                                                                                                                                                                                               | NA                                                      |



|                                  |                                                                                                                   |             |                                                                                                                                                                |    |
|----------------------------------|-------------------------------------------------------------------------------------------------------------------|-------------|----------------------------------------------------------------------------------------------------------------------------------------------------------------|----|
| Mackey et al. 2007 <sup>28</sup> | Gulf of Aqaba<br>-Station A (Israeli waters): 29°28'N, 34°55'E<br>-Station B (Jordanian waters): 29°22'N, 34°53'E | unspecified | Dust additions stimulated chlorophyll a, but did not affect alkaline phosphatase activity among nano and microplankton                                         | NA |
| Rubin et al. 2011 <sup>29</sup>  | Gulf of Aqaba                                                                                                     | Fe          | Trichodesmium accelerates Fe dissolution from dust via cell surface processes that involve efficient trapping and movement of the particles within the colony. | NA |

14  
15  
16  
17  
18  
19  
20  
21  
22  
23  
24  
25  
26  
27  
28  
29  
30  
31  
32  
33  
34  
35  
36  
37  
38  
39  
40  
41  
42  
43  
44  
45  
46  
47

### Supplementary references

- Moore, J. K., Lindsay, K., Doney, S., Long, M. & Misumi, K. Marine Ecosystem Dynamics and Biogeochemical Cycling in the Community Earth System Model1 (BGC): Comparison of the 1990s with the 2090s under the RCP4.5 and RCP8.5 scenarios. *J. Clim.* **26**, 9291–9312, doi:10.1175/jcli-d-12-00566.1 (2013).
- Zhang, Y. *et al.* Modeling the global emission, transport and deposition of trace elements associated with mineral dust. *Biogeosciences* **12**, (2015).
- Mahaffey, C., Reynolds, S., Davis, C. E. & Lohan, M. C. Alkaline phosphatase activity in the subtropical ocean: insights from nutrient, dust and trace metal addition experiments. *Front. Mar. Sci.* **1**, (2014).
- Browning, J. *et al.* Iron limitation of microbial phosphorus acquisition in the tropical North Atlantic. *Nat. Commun.* **in press**, (2017).
- Chien, C.-T. *et al.* Effects of African dust deposition on phytoplankton in the western tropical Atlantic Ocean off Barbados. *Global Biogeochem. Cycles* **30**, (2016).
- Mills, M. M., Ridame, C., Davey, M., La Roche, J. & Geider, R. J. Iron and phosphorus co-limit nitrogen fixation in the eastern tropical North Atlantic. *Nature* **429**, 292–294 (2004).
- Mackey, K. R. M., Mioni, C. E., Ryan, J. P. & Paytan, A. Phosphorus Cycling in the Red Tide Incubator Region of Monterey Bay in Response to Upwelling. *Front. Microbiol.* **3**, (2012).
- Duarte, C. M. *et al.* Aerosol inputs enhance new production in the subtropical northeast Atlantic. *J. Geophys. Res. Biogeosciences* **111**, G04006 (2006).
- Marañón, E. *et al.* Degree of oligotrophy controls the response of microbial plankton to {Saharan} dust. *Limnol. Oceanogr.* **55**, 2339–2352 (2010).
- Moore, C. M. *et al.* Iron limits primary productivity during spring bloom development in the central {North} {Atlantic}. *Glob. Chang. Biol.* **12**, 626–634 (2006).
- Langlois, R., Mills, M., Ridame, C., Croot, P. & LaRoche, J. Diazotrophic bacteria respond to Saharan dust additions. *Mar. Ecol. Prog. Ser.* **470**, 1–14 (2012).
- Guieu, C., Dulac, F., Ridame, C. & Pondaven, P. Introduction to project DUNE, a DUst experiment in a low Nutrient, low chlorophyll Ecosystem. *Biogeosciences* **11**, 425–442 (2014).
- Wuttig, K. *et al.* Impacts of dust deposition on dissolved trace metal concentrations (Mn, Al and Fe) during a mesocosm experiment - ProQuest. *Biogeosciences* **10**, 2583–2600 (2013).

- 48 14. Herut, B. *et al.* Response of East Mediterranean surface water to Saharan dust: On-board  
49 microcosm experiment and field observations. *Deep Sea Res. Part II Top. Stud. Oceanogr.* **52**,  
50 3024–3040 (2005).
- 51 15. Lekunberri, I. *et al.* Effects of a dust deposition event on coastal marine microbial abundance  
52 and activity, bacterial community structure and ecosystem function *{\textbar}* *{Journal}* of  
53 *{Plankton}* *{Research}* *{\textbar}* *{Oxford}* *{Academic}*. *J. Plankton Res.* **32**, 381–396 (2010).
- 54 16. Bonnet, S., Guieu, C., Chiaverini, J., Ras, J. & Stock, A. Effect of atmospheric nutrients on the  
55 autotrophic communities in a low nutrient, low chlorophyll system. *Limnol. Oceanogr.* **50**,  
56 1810–1819 (2005).
- 57 17. Romero, E. *et al.* Coastal Mediterranean plankton stimulation dynamics through a dust storm  
58 event: *{An}* experimental simulation. *Estuar. Coast. Shelf Sci.* **93**, 27–39 (2011).
- 59 18. Ridame, C. *et al.* Nutrient control of Nfixation in the oligotrophic Mediterranean Sea and the  
60 impact of Saharan dust events. *Biogeosciences* **8**, 2773–2783 (2011).
- 61 19. Ridame, C., Guieu, C. & L’Helguen, S. Strong stimulation of N<sub>2</sub> fixation in oligotrophic  
62 Mediterranean Sea: results from dust addition in large in situ mesocosms. *Biogeosciences* **10**,  
63 7333–7346 (2013).
- 64 20. Mackey, K. R. M. *et al.* Atmospheric and Fluvial Nutrients Fuel Algal Blooms in the East China  
65 Sea. *Front. Mar. Sci.* **4**, (2017).
- 66 21. Bonnet, S. *et al.* Nutrient limitation of primary productivity in the *{Southeast}* *{Pacific}*  
67 (*{BIO SOPE}* cruise). *Biogeosciences* **5**, 215–225 (2008).
- 68 22. Maki, T. *et al.* Effects of Asian Dust (KOSA) Deposition Event on Bacterial and Microalgal  
69 Communities in the Pacific Ocean. *Asian J. Atmos. Environ.* **5**, 157–163 (2011).
- 70 23. Liu, Y., Zhang, T. R., Shi, J. H., Gao, H. W. & Yao, X. H. Responses of chlorophyll a to added  
71 nutrients, *{Asian}* dust, and rainwater in an oligotrophic zone of the *{Yellow}* *{Sea}*:  
72 *{Implications}* for promotion and inhibition effects in an incubation experiment. *J. Geophys.*  
73 *Res. Biogeosciences* **118**, 2013JG002329 (2013).
- 74 24. Mélançon, J. *et al.* Impact of ocean acidification on phytoplankton assemblage, growth, and  
75 *{DMS}* production following *{Fe}*-dust additions in the *{NE}* *{Pacific}* high-nutrient, low-  
76 chlorophyll waters. *Biogeosciences* **13**, 1677–1692 (2016).
- 77 25. Hamme, R. C. *et al.* Volcanic ash fuels anomalous plankton bloom in subarctic northeast  
78 *{Pacific}*. *Geophys. Res. Lett.* **37**, L19604 (2010).
- 79 26. Wang, F. J. *et al.* Combined effects of iron and copper from atmospheric dry deposition on  
80 ocean productivity. *Geophys. Res. Lett.* **44**, 2016GL072349 (2017).
- 81 27. Paytan, A. *et al.* Toxicity of atmospheric aerosols on marine phytoplankton. *Proc. Natl. Acad.*  
82 *Sci.* **106**, 4601–4605 (2009).
- 83 28. Mackey, K. R. M. *et al.* Phosphorus availability, phytoplankton community dynamics, and  
84 taxon-specific phosphorus status in the Gulf of Aqaba, Red Sea. *Limnol. Oceanogr.* **52**, 873–  
85 885 (2007).
- 86 29. Rubin, M., Berman-Frank, I. & Shaked, Y. Dust- and mineral-iron utilization by the marine  
87 dinitrogen-fixer *Trichomesmium*. *Nat. Geosci.* **4**, 529–534 (2011).
- 88
